# Supplementary material for: Convergent insulin and TGF‐β signalling drives cancer cachexia by promoting aberrant fat body ECM accumulation in a Drosophila tumour model
Source: PubMed Central journal article supplement (PMC10702797; doi:10.15252/embr.202357695), 2023-11-28
Supplement: EMBR-24-e57695-s004.pdf [file EMBR-24-e57695-s004.pdf]

## Expanded View Figures

### Figure EV1. Tumour secreted Gbb and Impl2 rescue muscle integrity additively.

- A–D Muscle fillets of *Ras<sup>V12</sup>dlg1<sup>RNAi</sup>* tumour-bearing animals that express in the tumour *lacZ<sup>RNAi</sup>*; *mCherry<sup>RNAi</sup>* or *Impl2<sup>RNAi</sup>*; *lacZ<sup>RNAi</sup>*, or *gbb<sup>RNAi</sup>*; *mCherry<sup>RNAi</sup>* or *Impl2<sup>RNAi</sup>*; *gbb<sup>RNAi</sup>*.
- E Quantification of muscle detachment in (A–D). *lacZ<sup>RNAi</sup>*; *mCherry<sup>RNAi</sup>* (*n* = 8), *Impl2<sup>RNAi</sup>*; *lacZ<sup>RNAi</sup>* (*n* = 11), *gbb<sup>RNAi</sup>*; *mCherry<sup>RNAi</sup>* (*n* = 8), *Impl2<sup>RNAi</sup>*; *gbb<sup>RNAi</sup>* (*n* = 16).
- F, G OPP staining detecting protein translation in the fat body of *w<sup>1118</sup>* and *Ras<sup>V12</sup>dlg1<sup>RNAi</sup>* tumour-bearing animals.
- H Quantification of OPP in (F, G). *w<sup>1118</sup>* (*n* = 19) *Ras<sup>V12</sup>dlg1<sup>RNAi</sup>* (*n* = 26)
- I–L OPP staining detecting protein translation in the fat body of *Ras<sup>V12</sup>dlg1<sup>RNAi</sup>* tumour-bearing animals, that express in the tumour *lacZ<sup>RNAi</sup>*; *mCherry<sup>RNAi</sup>* or *Impl2<sup>RNAi</sup>*; *lacZ<sup>RNAi</sup>*, or *gbb<sup>RNAi</sup>*; *mCherry<sup>RNAi</sup>* or *Impl2<sup>RNAi</sup>*; *gbb<sup>RNAi</sup>*.
- M Quantification of OPP in (I–L). *w<sup>1118</sup>* (*n* = 10); *LacZ<sup>RNAi</sup>*; *mCherry<sup>RNAi</sup>* (*n* = 22), *Impl2<sup>RNAi</sup>*; *lacZ<sup>RNAi</sup>* (*n* = 13), *gbb<sup>RNAi</sup>*; *mCherry<sup>RNAi</sup>* (*n* = 15), *Impl2<sup>RNAi</sup>*; *gbb<sup>RNAi</sup>* (*n* = 14).
- N, O Nidogen staining detecting ECM localisation in the fat body of *w<sup>1118</sup>* and *Ras<sup>V12</sup>dlg1<sup>RNAi</sup>* animals.
- P Quantification of nidogen staining in (N, O). *w<sup>1118</sup>* (*n* = 23) *Ras<sup>V12</sup>dlg1<sup>RNAi</sup>* (*n* = 20).
- Q–T *Ras<sup>V12</sup>dlg1<sup>RNAi</sup>* tumour-bearing animals that express *lacZ<sup>RNAi</sup>*; *mCherry<sup>RNAi</sup>* or *Impl2<sup>RNAi</sup>*; *lacZ<sup>RNAi</sup>*, or *gbb<sup>RNAi</sup>*; *mCherry<sup>RNAi</sup>* or *Impl2<sup>RNAi</sup>*; *gbb<sup>RNAi</sup>*.
- U Quantification of Nidogen in (Q, T). *w<sup>1118</sup>* (*n* = 9); *LacZ<sup>RNAi</sup>*; *mCherry<sup>RNAi</sup>* (*n* = 17), *Impl2<sup>RNAi</sup>*; *lacZ<sup>RNAi</sup>* (*n* = 22), *gbb<sup>RNAi</sup>*; *mCherry<sup>RNAi</sup>* (*n* = 9), *Impl2<sup>RNAi</sup>*; *gbb<sup>RNAi</sup>* (*n* = 9).

Data information: Scale bar is 50  $\mu$ m for fat body staining (F, G, I–L, N, O, Q–T) and 500  $\mu$ m for muscle fillets (A–D). Graphs are represented as Mean  $\pm$  SEM, *n* = the number of samples. (\*) *P* < 0.05 (\*\*) *P* < 0.01, (\*\*\*) *P* < 0.001, (\*\*\*\*) *P* < 0.0001. For experiments with two genotypes, two-tailed unpaired student's *t*-tests were used to test for significant differences. The Welch's correction was applied in cases of unequal variances. For experiments with more than two genotypes, significant differences between specific genotypes were tested using a one-way ANOVA and a subsequent Šidák *post-hoc* test.

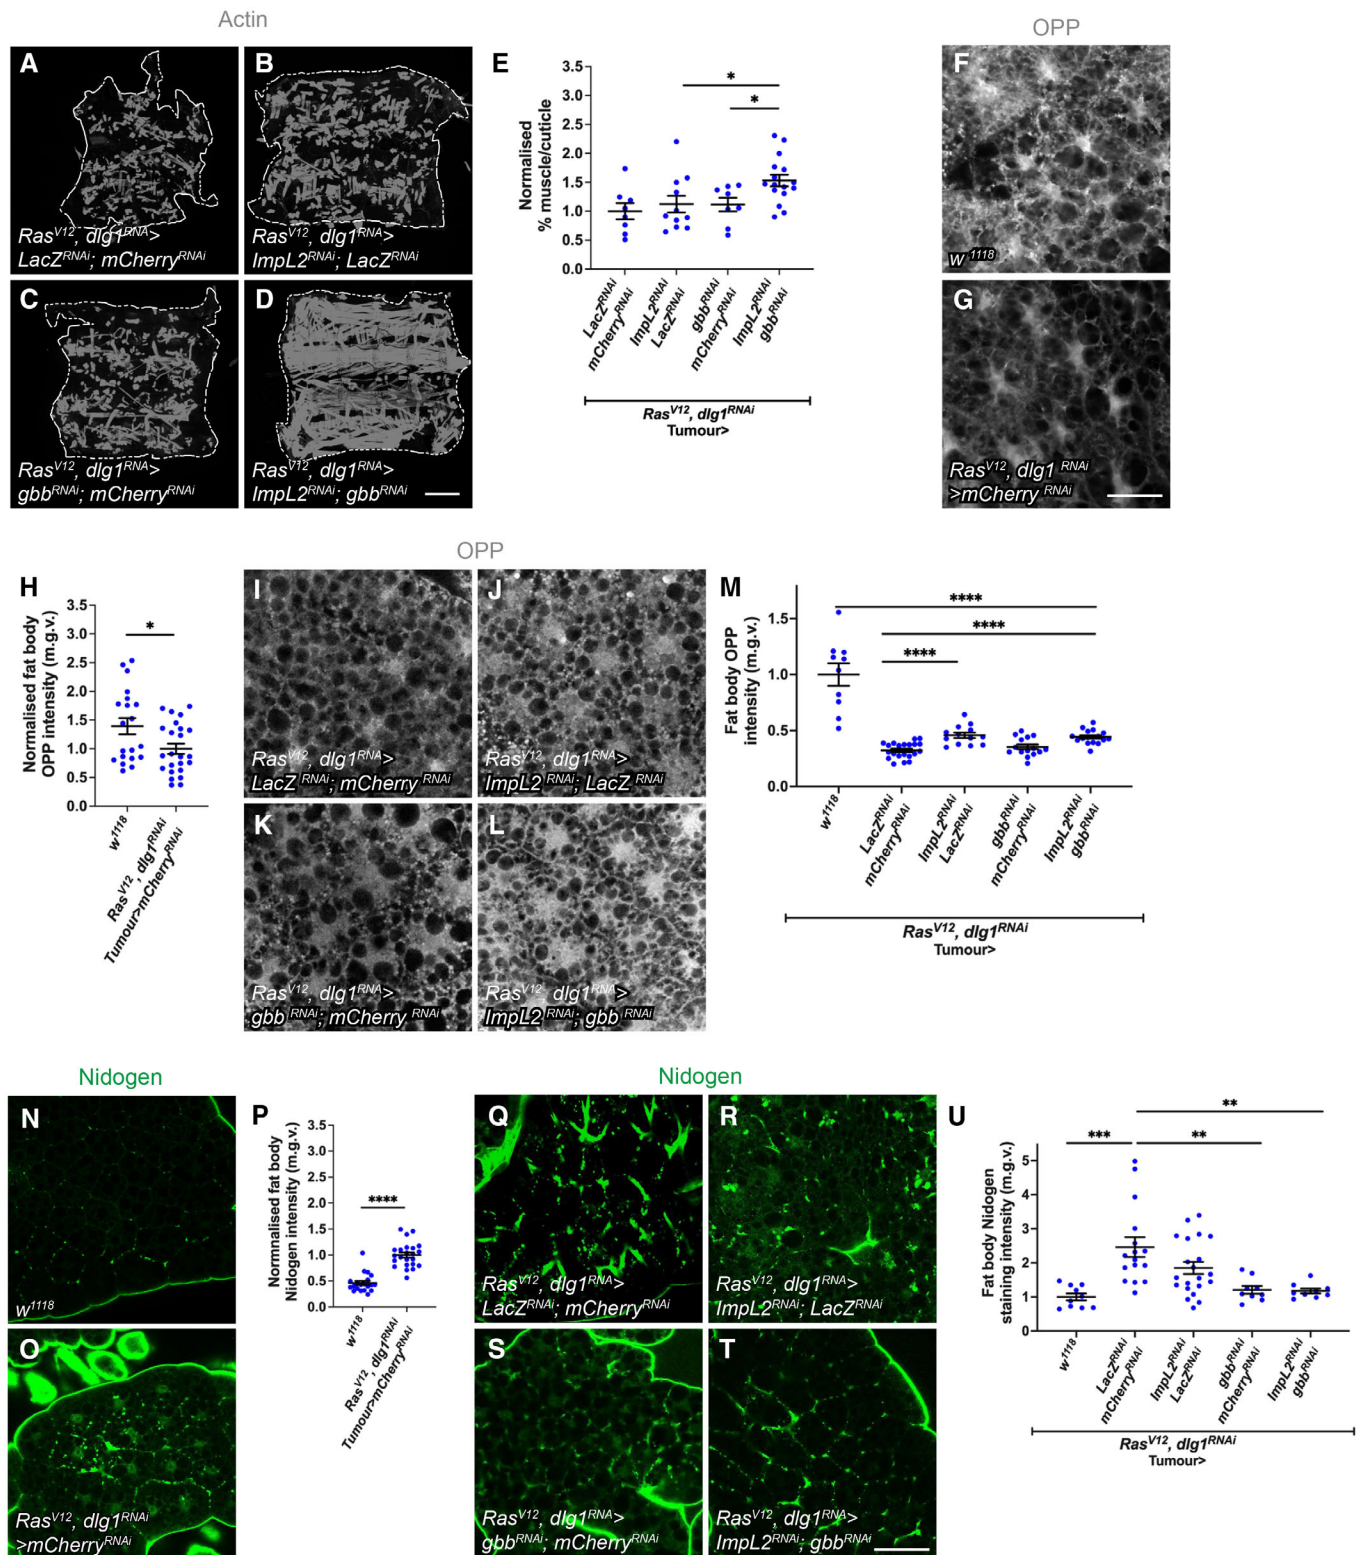

Figure EV1.

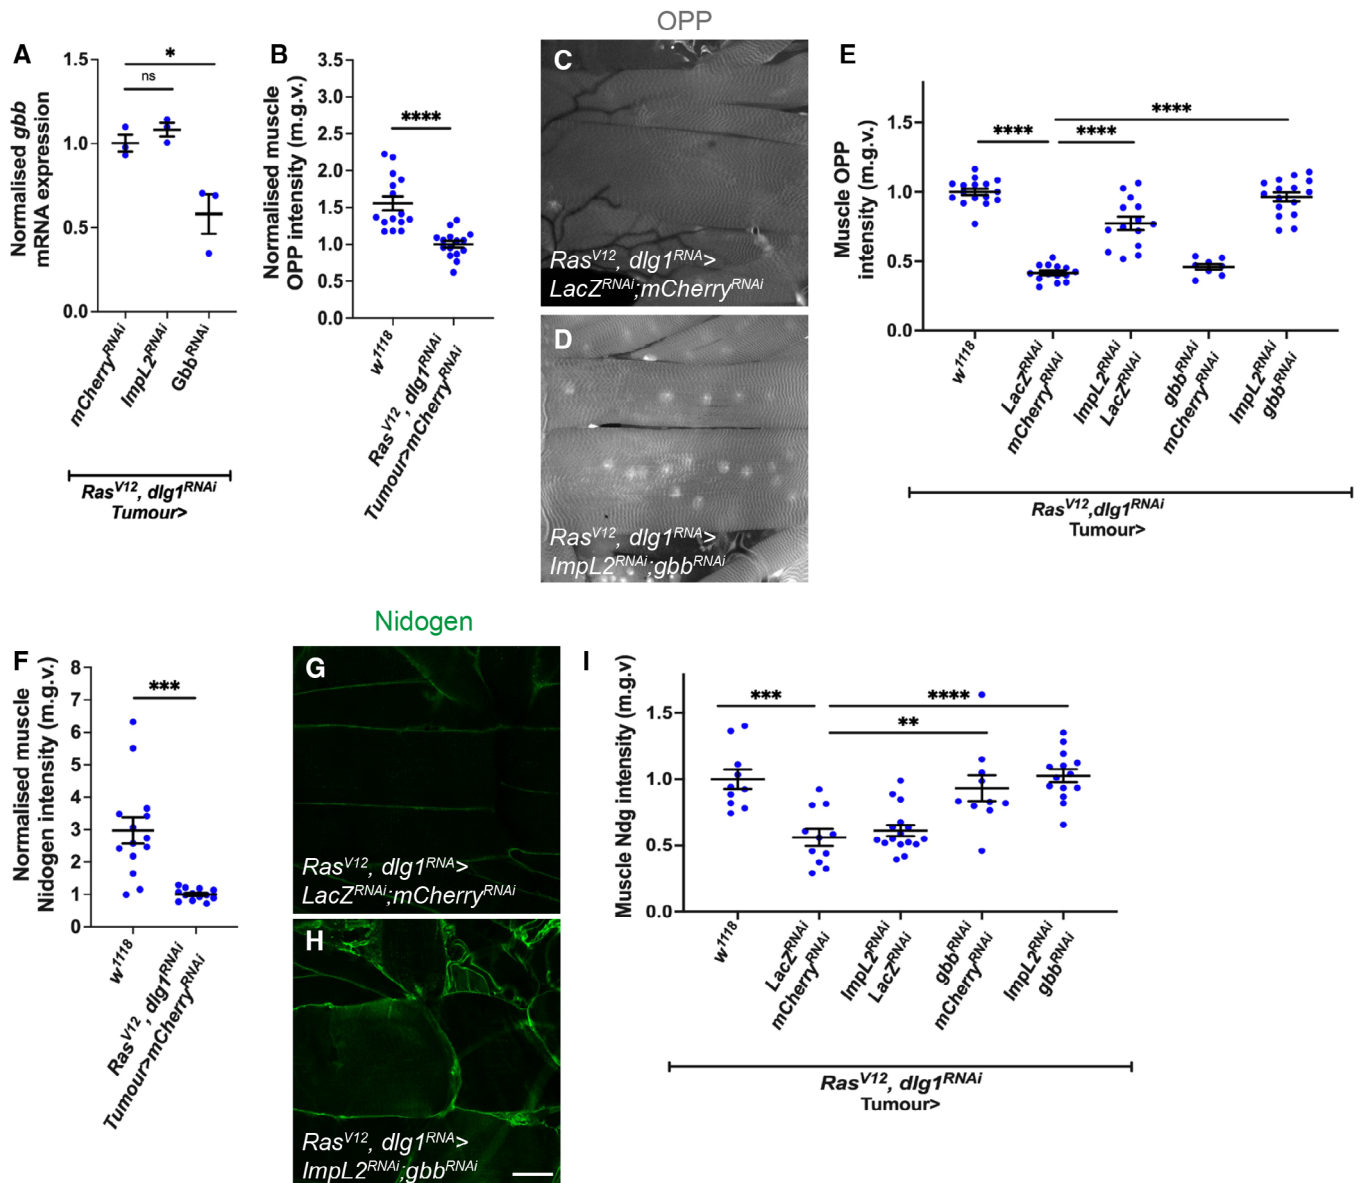

**Figure EV3. Muscle overexpression of Akt (but not fat body Akt or mad RNAi overexpression) rescues atrophy in cachectic animals, and TGF- $\beta$  signalling in the muscle is responsive to modulation in tumour insulin signalling but is not required for muscle integrity in cachexia.**

- A, B Muscle fillets stained with phalloidin (Actin) where *luciferase* or *Akt* was expressed under the control of *MHC-GAL4* in *QRas<sup>V12</sup>scrib<sup>RNAi</sup>* tumour-bearing animals.
- C Quantification of normalised muscle detachment in (A, B). Wild type control (*MHC>mCherry<sup>RNAi</sup>*,  $n = 3$ ), *UAS-luciferase* ( $n = 10$ ), *Akt* ( $n = 17$ ).
- D, E Muscle segment (outlined) where *luciferase* or *Akt* was expressed under the control of *MHC-GAL4* in *QRas<sup>V12</sup>scrib<sup>RNAi</sup>* tumour-bearing animals.
- F Quantification of normalised muscle width/length in (D, E). Wild type control ( $n = 15$ ), *luciferase* ( $n = 9$ ), *Akt* ( $n = 16$ ).
- G, H Muscle Nidogen staining where *luciferase* or *Akt* was expressed under the control of *MHC-GAL4* in *QRas<sup>V12</sup>scrib<sup>RNAi</sup>* tumour-bearing animals.
- I Quantification of normalised muscle Nidogen staining in (G, H). *luciferase* ( $n = 16$ ), *Akt* ( $n = 15$ ).
- J, K Muscle segment from *QRas<sup>V12</sup>scrib<sup>RNAi</sup>* tumour-bearing animals, where *mCherry<sup>RNAi</sup>* or *Akt* was expressed in the fat body (*r4-GAL4*).
- L Quantification of normalised muscle width/length in (J, K). *r4>mCherry<sup>RNAi</sup>* ( $n = 9$ ), *QRas<sup>V12</sup>scrib<sup>RNAi</sup>;r4>mCherry<sup>RNAi</sup>* ( $n = 5$ ), *QRas<sup>V12</sup>scrib<sup>RNAi</sup>;r4>Akt* ( $n = 8$ ).
- M, N Muscle segment from *QRas<sup>V12</sup>scrib<sup>RNAi</sup>* tumour-bearing animals, where *mCherry<sup>RNAi</sup>* or *mad<sup>RNAi</sup>* was expressed in the fat body (*r4-GAL4*).
- O Quantification of normalised muscle width/length in (M, N). *r4>mCherry<sup>RNAi</sup>* ( $n = 11$ ), *QRas<sup>V12</sup>scrib<sup>RNAi</sup>;r4>mCherry<sup>RNAi</sup>* ( $n = 18$ ), *QRas<sup>V12</sup>scrib<sup>RNAi</sup>;r4>mad<sup>RNAi</sup>* ( $n = 15$ ).
- P Quantification of normalised muscle OPP intensity where *luciferase* ( $n = 10$ ) or *Akt* ( $n = 16$ ) was expressed under the control of *MHC-GAL4* in *QRas<sup>V12</sup>scrib<sup>RNAi</sup>* tumour-bearing animals.
- Q, R Muscle from *Ras<sup>V12</sup>dlg1<sup>RNAi</sup>* tumour-bearing animals expressing either *mCherry<sup>RNAi</sup>* or *Impl2<sup>RNAi</sup>* in the tumour, where TGF- $\beta$  signalling activation is indicated by pMad staining.
- S Quantification of normalised muscle pMad intensity in (Q, R). *w<sup>1118</sup>* ( $n = 30$ ), *mCherry<sup>RNAi</sup>* ( $n = 30$ ), *Impl2<sup>RNAi</sup>* ( $n = 26$ ).
- T Quantification of normalised muscle detachment where *MHC>mCherry<sup>RNAi</sup>* ( $n = 5$ ) or *mCherry<sup>RNAi</sup>* ( $n = 9$ ) or *lacZ<sup>RNAi</sup>;mad<sup>RNAi</sup>* ( $n = 6$ ) was expressed under the control of *MHC-GAL4* in *QRas<sup>V12</sup>scrib<sup>RNAi</sup>* tumour-bearing animals.

Data information: Scale bar is 500  $\mu\text{m}$  for muscle fillets (A, B), 100  $\mu\text{m}$  for muscle segment atrophy measurements (D, E, J, K, M, N) and 50  $\mu\text{m}$  for muscle Nidogen and pMad staining (G, H, Q, R). Muscles in tumour bearing animals were dissected at day 6 after tumour induction. Graphs are represented as Mean  $\pm$  SEM,  $n$  = the number of samples. (\*)  $P < 0.05$  (\*\*)  $P < 0.01$ , (\*\*\*)  $P < 0.001$ , (\*\*\*\*)  $P < 0.0001$ , (ns)  $P > 0.05$ . For experiments with two genotypes, two-tailed unpaired student's  $t$ -tests were used to test for significant differences. The Welch's correction was applied in cases of unequal variances. For experiments with more than two genotypes, significant differences between specific genotypes were tested using a one-way ANOVA and a subsequent Šidák *post-hoc* test.

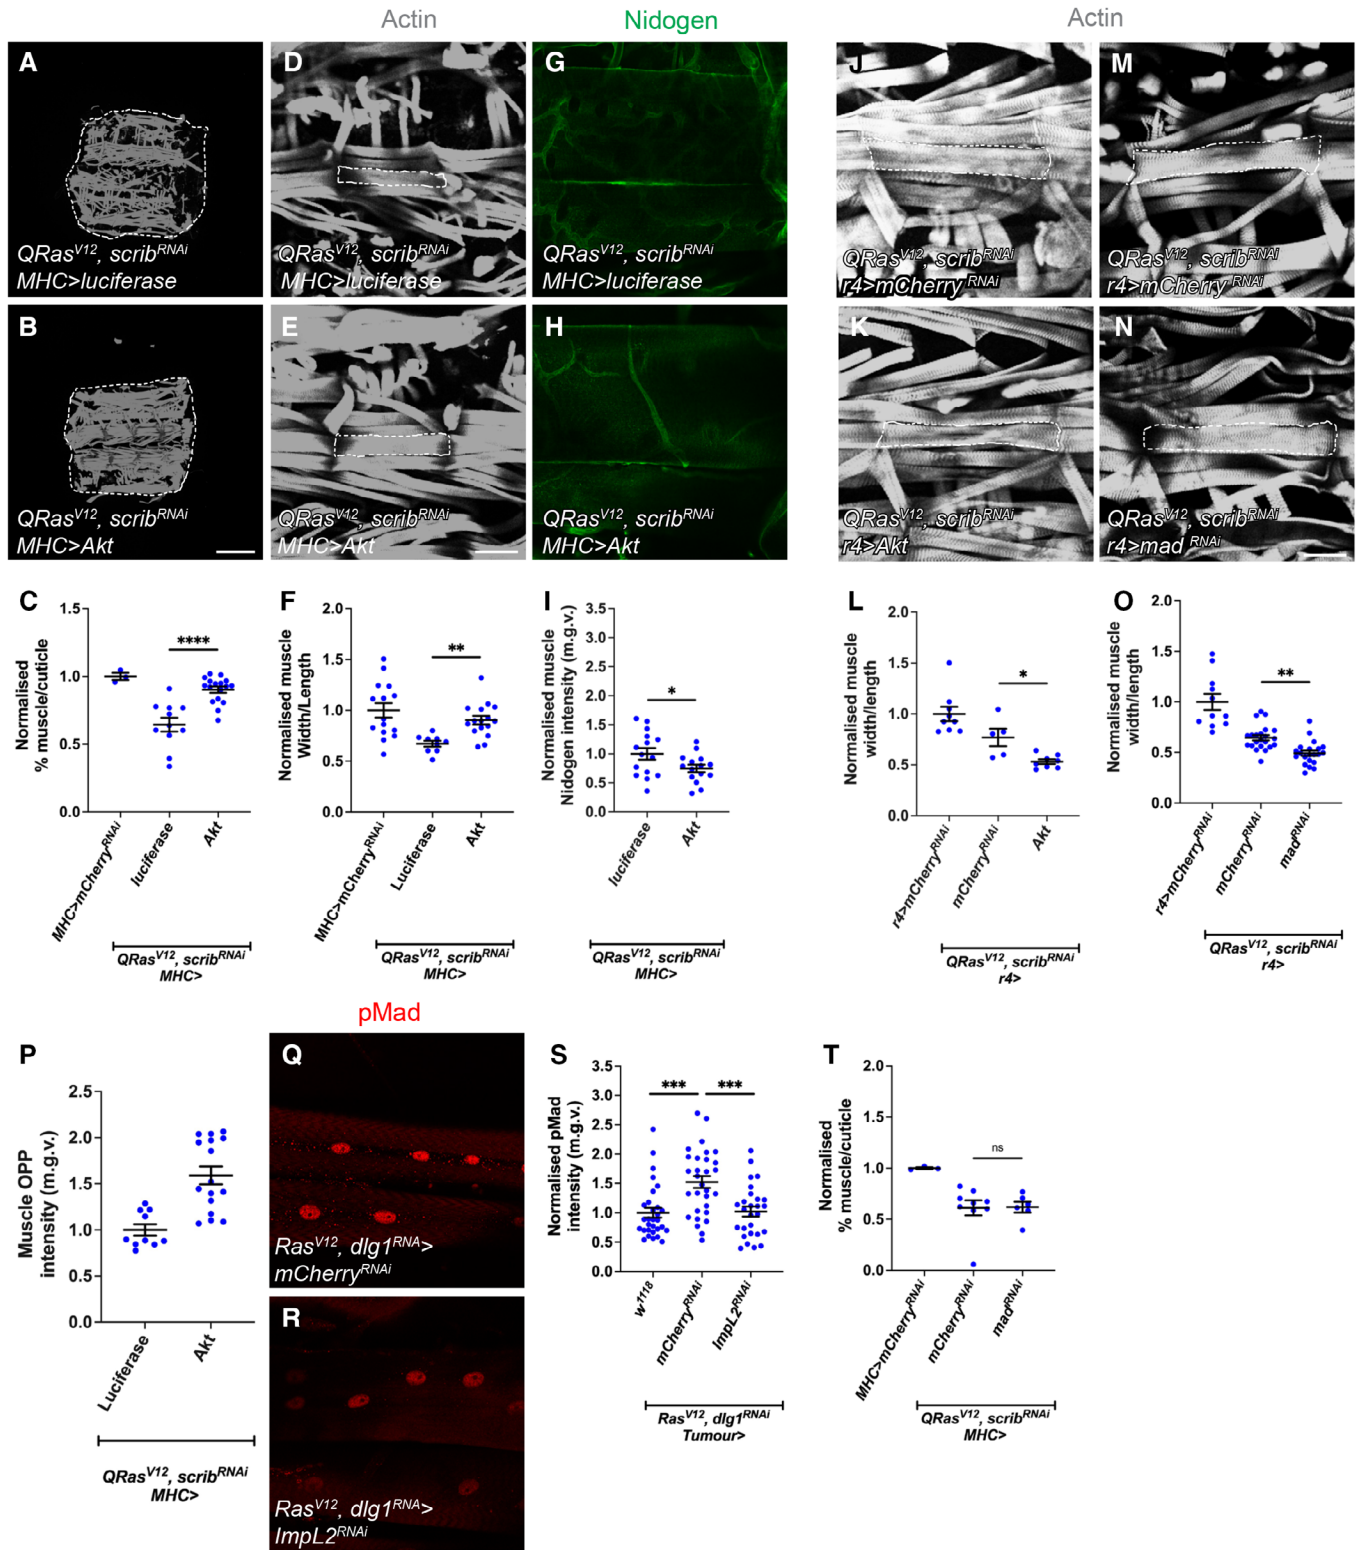

Figure EV3.

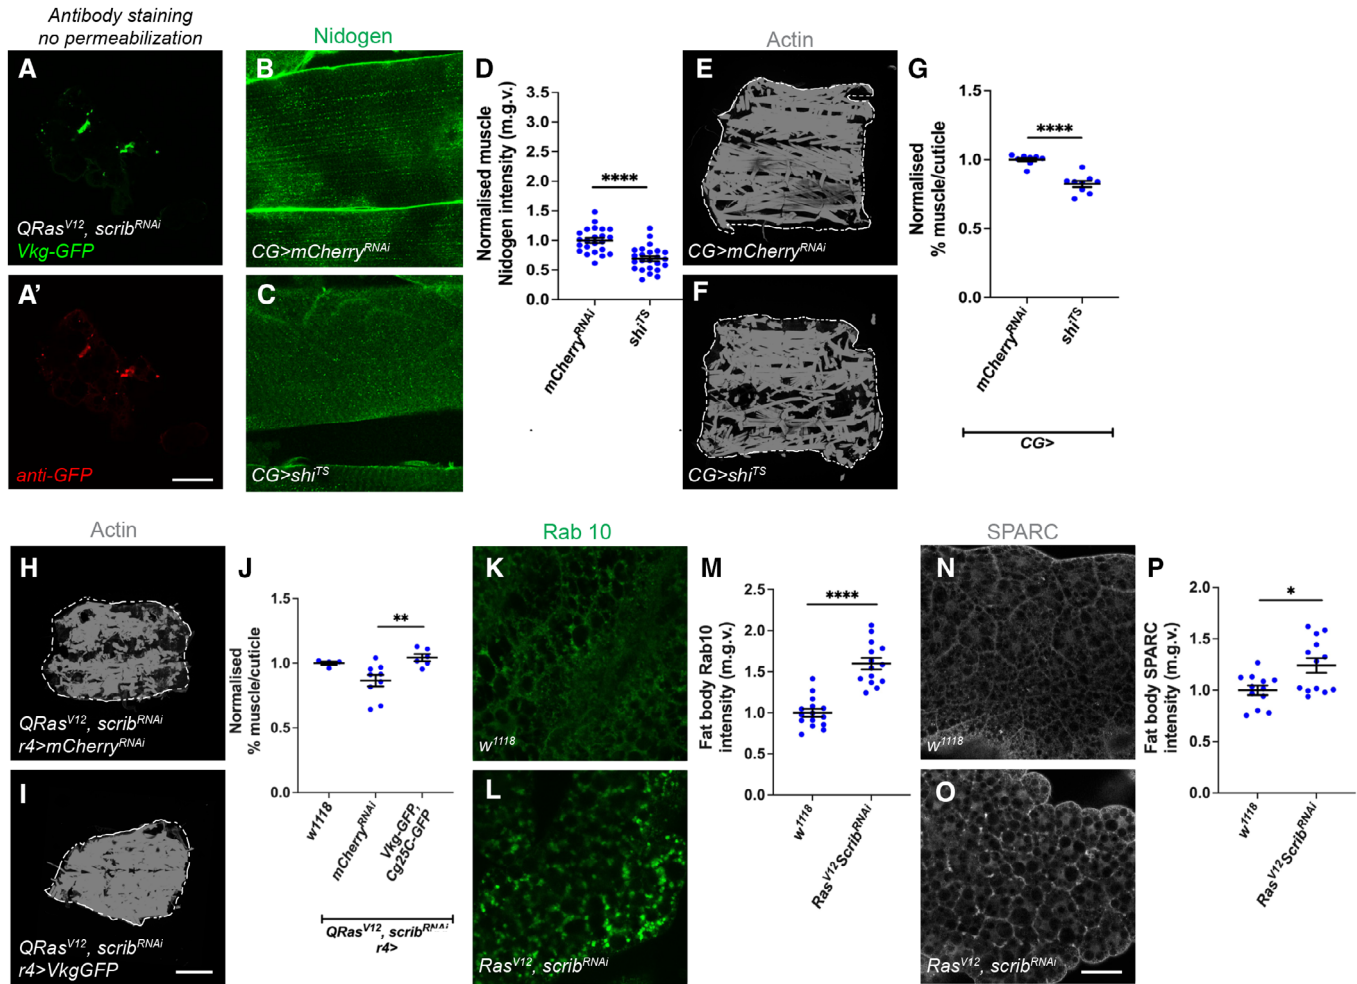

Data information: Scale bar is 500  $\mu\text{m}$  for muscle fillets (E, F, H, I) 50  $\mu\text{m}$  for muscle Nidogen and GFP staining (A, A', B, C) and 50  $\mu\text{m}$  for fat body staining (K, L, N, O). Muscles in *Shi<sup>TS</sup>* animals were dissected at day 5 ALH, muscles and fat body in tumour bearing animals were dissected at day 6 after tumour induction. Graphs are represented as Mean  $\pm$  SEM,  $n$  = the number of samples. (\*)  $P < 0.05$  (\*\*)  $P < 0.01$ , (\*\*\*\*)  $P < 0.0001$ . For experiments with two genotypes, two-tailed unpaired student's  $t$ -tests were used to test for significant differences. The Welch's correction was applied in cases of unequal variances. For experiments with more than two genotypes, significant differences between specific genotypes were tested using a one-way ANOVA and a subsequent Sidak *post-hoc* test.

**Figure EV5. Modulating fat body TGF- $\beta$  signalling alters *sparc* and *rab10* transcription, and modulating fat body InR alters *sog* transcription.**

- A Knockdown efficiency of *sog*<sup>RNAi</sup> and *mad*<sup>RNAi</sup> as indicated by qPCR and western blotting respectively. For qPCR, error bars represent SEM,  $n = 3$  for biological replicates.
- B Fat body qPCR showing normalised mRNA expression levels of SPARC and Rab10 upon the expression of *mCherry*<sup>RNAi</sup> compared to *UAS-Mad*. Error bars represent SD,  $n = 3$  for biological replicates.
- C Fat body qPCRs showing normalised mRNA expression levels of TGF- $\beta$  receptors and ligands in *InR*<sup>CA</sup> or *mCherry*<sup>RNAi</sup> larvae (raised at 18°C) with *CG-GAL4* ( $n = 3$ , biological replicates). Error bars represent SD.
- D Summary diagram—*Left*: during development, insulin signalling in the fat body activates the transcription of *sog*, which inhibits Gbb and prevents the activation of TGF- $\beta$  signalling in the fat body. This allows fat body ECM to be secreted to function in the muscle. Insulin signalling in the muscle in parallel enhances translation and muscle growth. *Right*: in tumour-bearing/cachectic animals, tumours secrete two ligands: ImpL2 and Gbb. In the fat body, ImpL2 inhibits insulin signalling, preventing the transcription of *sog* and thus Sog can no longer inhibit Gbb. In addition, tumour secreted Gbb binds to Tkv to activate TGF- $\beta$  signalling in the fat body, resulting in an accumulation of ECM proteins, to prevent ECM transport out of the fat body to reach the muscle. In the muscle, ImpL2 inhibits insulin signalling, which inhibits translation and muscle growth. Fat body in tumour bearing animals were dissected at day 6 after tumour induction. Fat body in non-tumour bearing animals were dissected at day 5 ALH.

Data information: (\*)  $P < 0.05$  (\*\*)  $P < 0.01$ , (\*\*\*)  $P < 0.001$ , (\*\*\*\*)  $P < 0.0001$ . Two-tailed unpaired student's *t*-tests were used to test for significant differences. The Welch's correction was applied in cases of unequal variances.

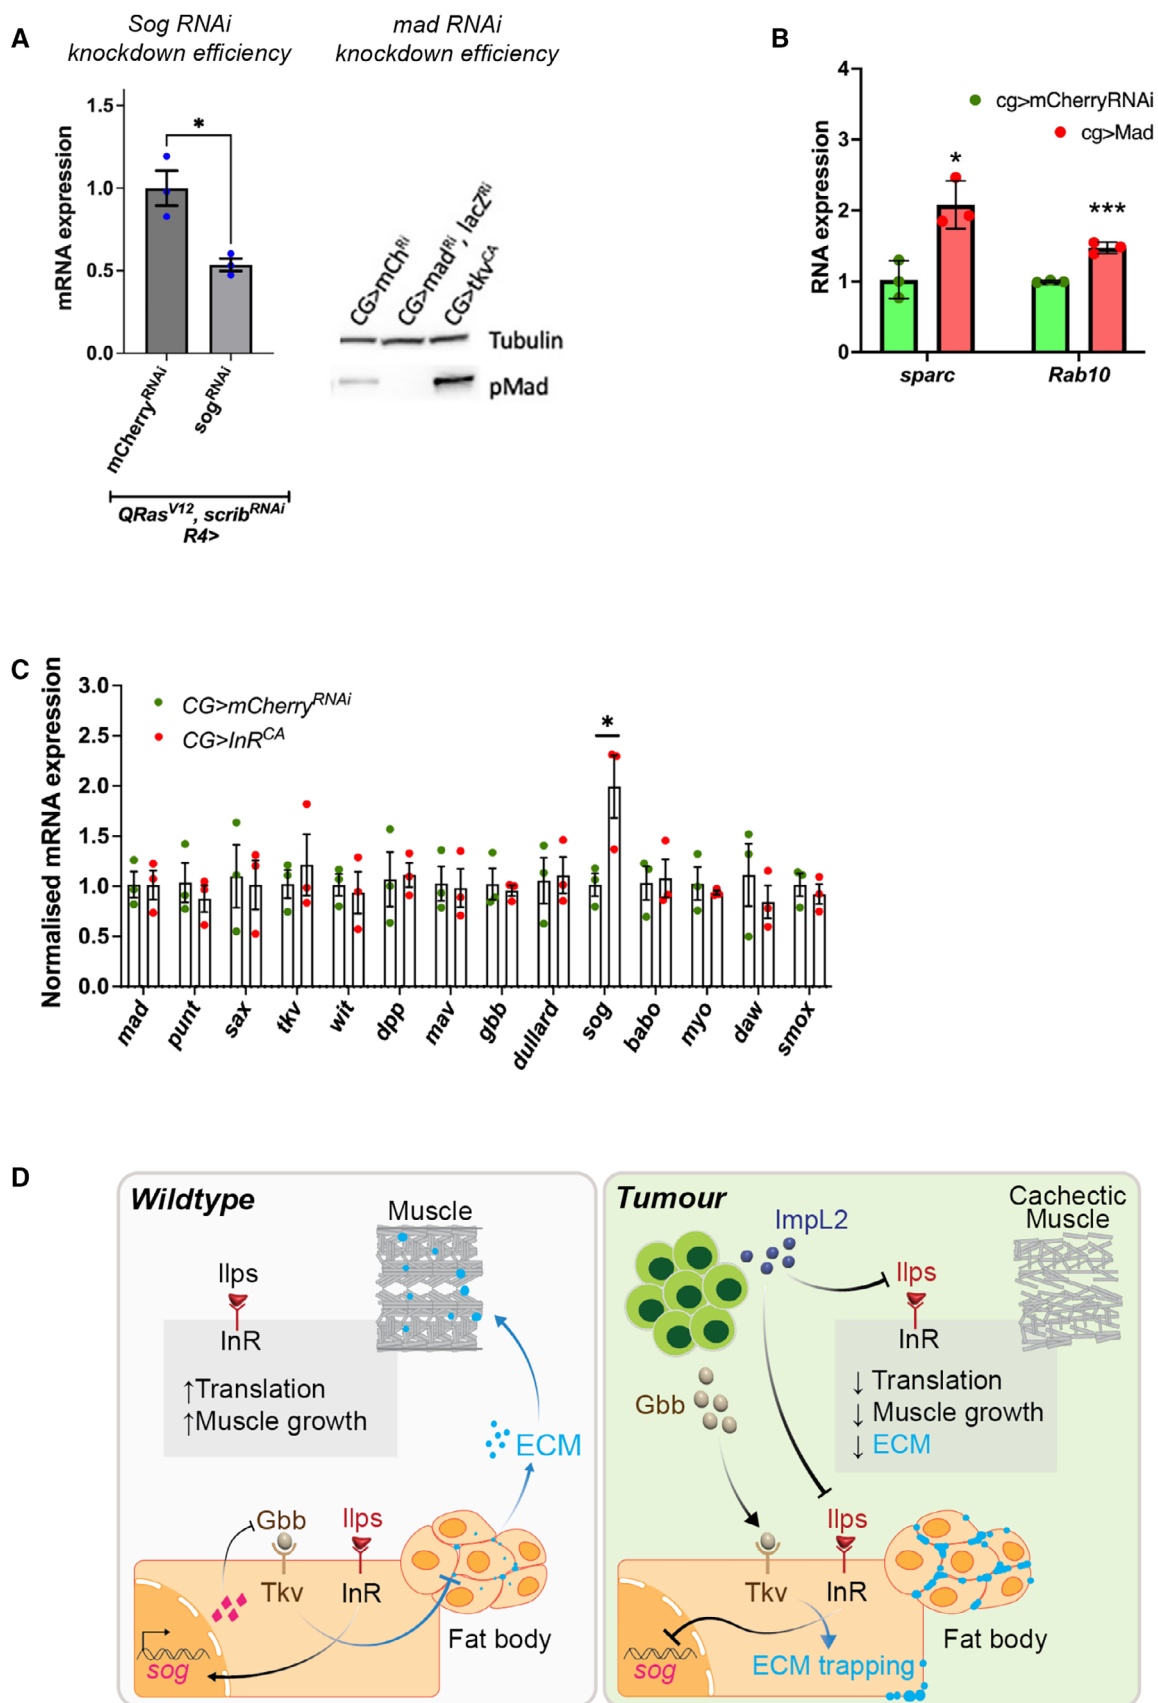

Figure EV5.
